# Supplementary material
Source: PubMed Central journal article supplement (PMC3351827)
Supplement: supp_M022988_jlr.M022988-1.pdf [file supp_M022988_jlr.M022988-1.pdf]

## Supplemental Materials and Methods

For apoC1 distribution studies, an additional group of 23 normolipidemic, non-diabetic, healthy subjects was recruited. In addition to normal lipid levels, all subjects had normal glucose and creatinin levels. All subjects gave written informed consent and the protocol, complying with the Declaration of Helsinki was approved by the local Research Ethics Committee.

**Supplemental Table 1.** Characteristics of the group of healthy subjects used for determination of apoC1 distribution among lipoproteins.

|                                   |             |
|-----------------------------------|-------------|
| <b>Age (yrs)</b>                  | 37.7 ± 12.1 |
| <b>Gender M (n (%))</b>           | 12 (52)     |
| <b>BMI</b>                        | 22.6 ± 3.0  |
| <b>Glycemia (mmol/L)</b>          | 5.2 ± 0.8   |
| <b>Creatinin (umol/L)</b>         | 79.9 ± 15.1 |
| <b>Total cholesterol (mmol/L)</b> | 4.6 ± 0.9   |
| <b>Triglycerides (mmol/L)</b>     | 0.8 ± 0.2   |
| <b>HDL-C (mmol/L)</b>             | 1.58 ± 0.40 |
| <b>LDL-C (mmol/L)</b>             | 2.85 ± 0.70 |
| <b>CETP mass (mg/L)</b>           | 3.09 ± 0.40 |
| <b>Apo C1 mass (mg/L)</b>         | 85.9 ± 25.8 |

BMI= Body Mass Index. Otherwise specified, values are mean ± SD.
